# Supplementary material for: Immune cellular networks underlying recovery from influenza virus infection in acute hospitalized patients
Source: PubMed Central journal article supplement (PMC8113517; doi:10.1038/s41467-021-23018-x), 2021-05-11
Supplement: 41467_2021_23018_MOESM1_ESM.pdf [file 41467_2021_23018_MOESM1_ESM.pdf]

## SUPPLEMENTARY INFORMATION

### **Immune cellular networks underlying recovery from influenza virus infection in acute hospitalized patients**

Thi H. O. Nguyen<sup>1</sup>, Marios Koutsakos<sup>1</sup>, Carolien E. van de Sandt<sup>1,2</sup>, Jeremy Chase Crawford<sup>3</sup>, Liyen Loh<sup>1</sup>, Sneha Sant<sup>1</sup>, Ludivine Grzelak<sup>4</sup>, Emma K. Allen<sup>3</sup>, Tim Brahm<sup>3</sup>, E. Bridie Clemens<sup>1</sup>, Maria Auladell<sup>1</sup>, Luca Hensen<sup>1</sup>, Zhongfang Wang<sup>1</sup>, Simone Nüssing<sup>1</sup>, Xiaoxiao Jia<sup>1</sup>, Patrick Günther<sup>1</sup>, Adam K. Wheatley<sup>1</sup>, Stephen J. Kent<sup>1,5,6</sup>, Malet Aban<sup>7</sup>, Yi-Mo Deng<sup>7</sup>, Karen L. Laurie<sup>7,8</sup>, Aeron C. Hurt<sup>7</sup>, Stephanie Gras<sup>9-11</sup>, Jamie Rossjohn<sup>9,10,12</sup>, Jane Crowe<sup>13</sup>, Jianqing Xu<sup>14</sup>, David Jackson<sup>1</sup>, Lorena E. Brown<sup>1</sup>, Nicole La Gruta<sup>9</sup>, Weisan Chen<sup>11</sup>, Peter C. Doherty<sup>1</sup>, Stephen J. Turner<sup>15</sup>, Tom C. Kotsimbos<sup>16,17</sup>, Paul G. Thomas<sup>3</sup>, Allen C. Cheng<sup>18,19\*#</sup> and Katherine Kedzierska<sup>1\*#</sup>

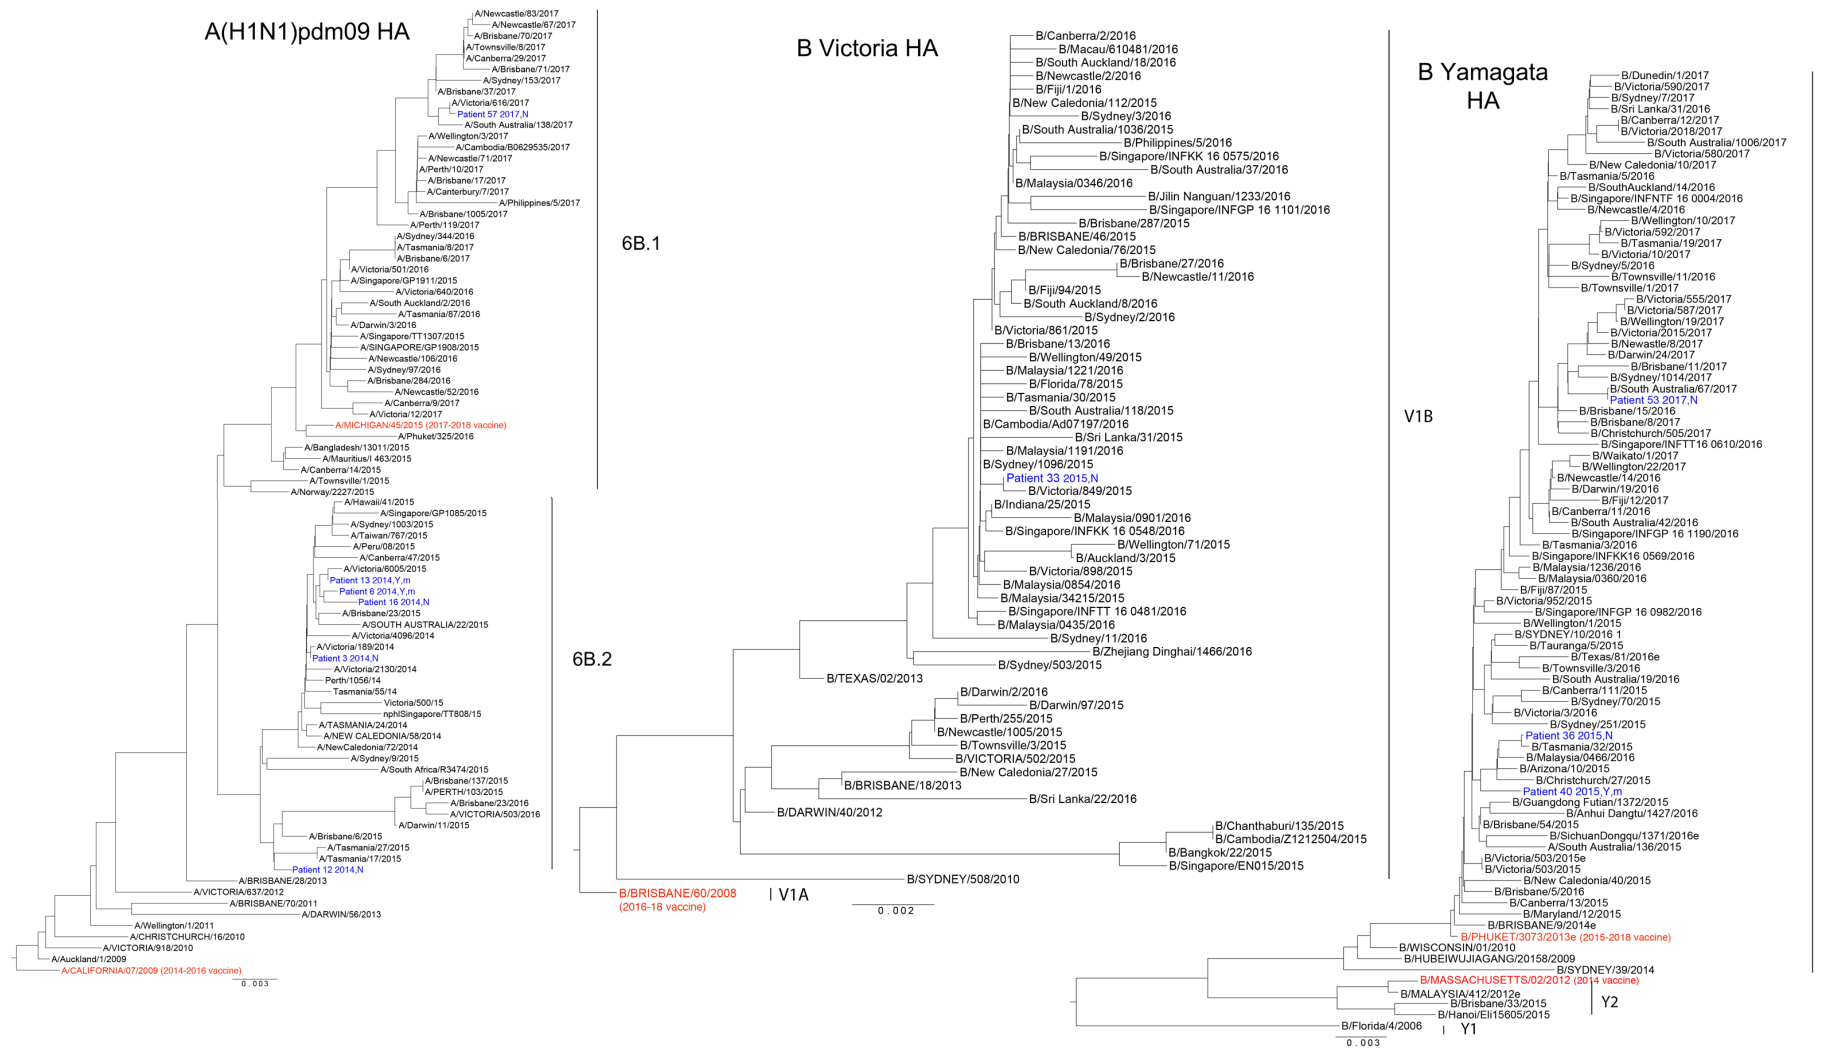

**Supplementary Figure 1. HA phylogenetic trees for H1 and B strains.** WHO reference strains are shown in black, influenza vaccine strains are in red, and sequences isolated from the nasal swab of patients are in blue. Patient number is followed by the year of recruitment, yes (Y) or no (N) for prior vaccination in the year of infection, and “m” for vaccine match. Scale bars represent the number of substitutions per site.

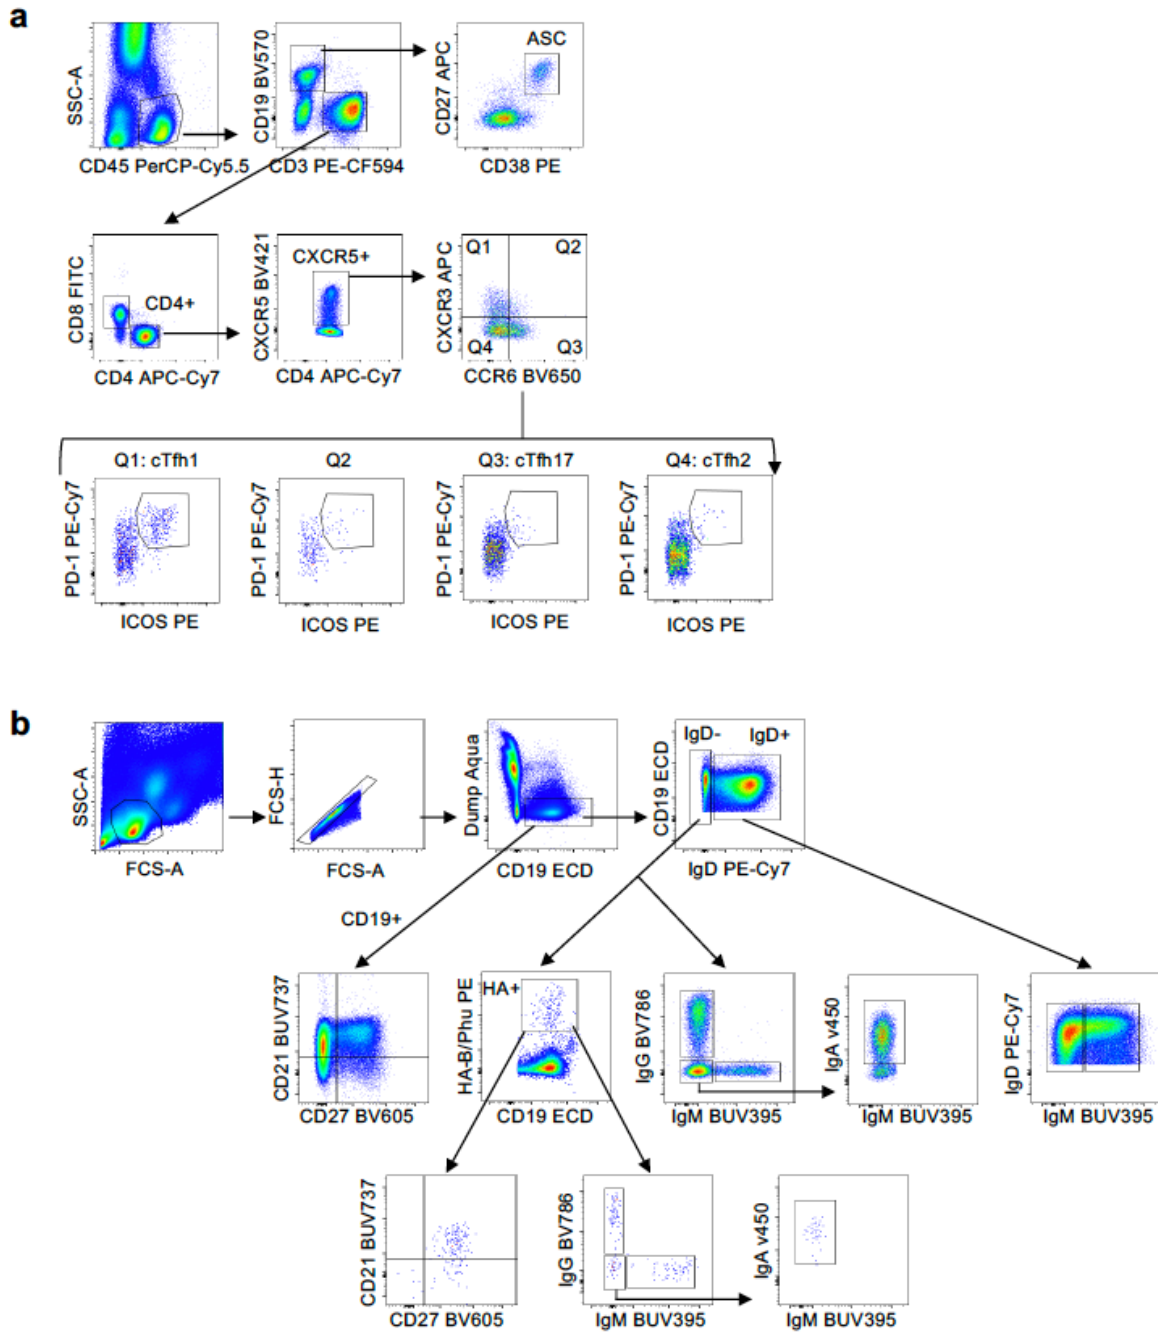

Supplementary Figure 2. Flow cytometry gating strategies for (a) cTfh, ASC (Fig. 3) and (b) HA-specific B cells (Fig. 4).

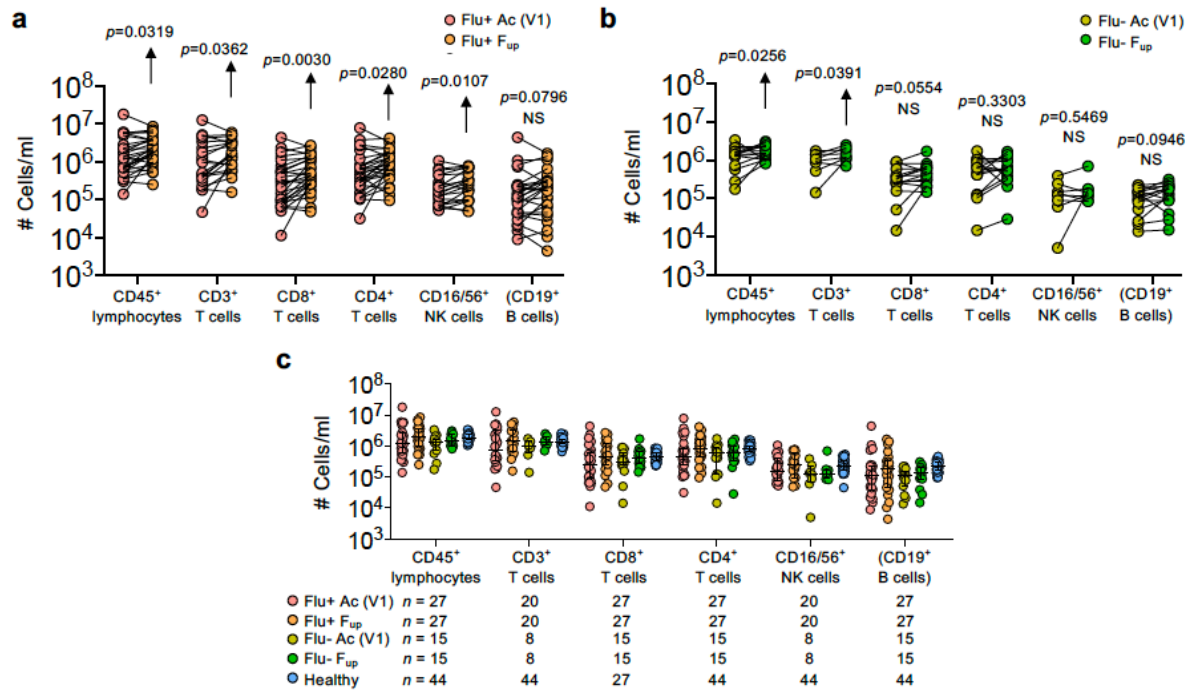

**Supplementary Figure 3. Lymphopenia observed in patients during acute infection. a,b,** Absolute numbers of cell subsets at acute (V1) and matching follow-up time-points in influenza+ (Flu+) and influenza- (Flu-) patients, where available. Statistical significance ( $0.0001 > p < 0.05$ ) was determined using Wilcoxon test (two-sided) between acute and follow-up. **c,** Absolute numbers of cell subsets at acute (V1) and follow-up time-points in influenza+ patients in comparison to influenza- and healthy donors from the 2015-2016 pre-vaccinated cohort. Median, IQR and exact  $n$  numbers are shown for each group.

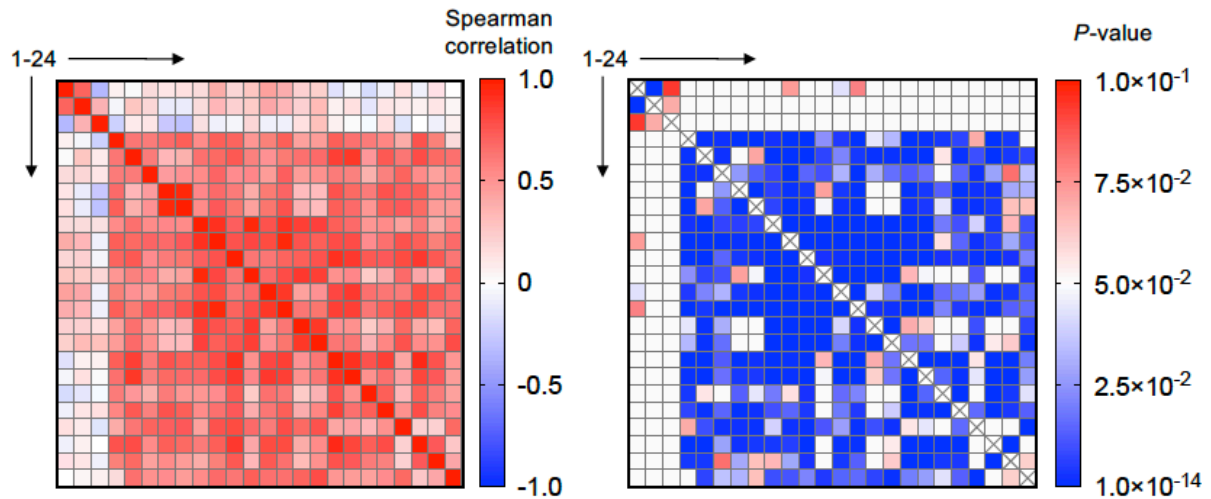

**Legend**

- |                                                     |                                                                                     |
|-----------------------------------------------------|-------------------------------------------------------------------------------------|
| 1. Ac titre                                         | 13. Ac CD27 <sup>-</sup> CD21 <sup>+</sup> rHA <sup>+</sup> B cells/ml              |
| 2. F <sub>up</sub> titre                            | 14. Ac CD27 <sup>+</sup> CD21 <sup>+</sup> rHA <sup>+</sup> B cells/ml              |
| 3. Fold titre                                       | 15. Ac CD27 <sup>+</sup> CD21 <sup>-</sup> rHA <sup>+</sup> B cells/ml              |
| 4. CD19 <sup>+</sup> B cells/ml                     | 16. Ac CD27 <sup>-</sup> CD21 <sup>-</sup> rHA <sup>+</sup> B cells/ml              |
| 5. AC <sub>max</sub> ASC/ml                         | 17. F <sub>up</sub> rHA <sup>+</sup> B cells/ml                                     |
| 6. AC <sub>max</sub> Tfh1/ml                        | 18. F <sub>up</sub> IgG <sup>+</sup> rHA <sup>+</sup> B cells/ml                    |
| 7. AC <sub>max</sub> Tfh17/ml                       | 19. F <sub>up</sub> IgM <sup>+</sup> rHA <sup>+</sup> B cells/ml                    |
| 8. AC <sub>max</sub> Tfh2/ml                        | 20. F <sub>up</sub> IgA <sup>+</sup> rHA <sup>+</sup> B cells/ml                    |
| 9. Ac rHA <sup>+</sup> B cells/ml                   | 21. F <sub>up</sub> CD27 <sup>-</sup> CD21 <sup>+</sup> rHA <sup>+</sup> B cells/ml |
| 10. Ac IgG <sup>+</sup> rHA <sup>+</sup> B cells/ml | 22. F <sub>up</sub> CD27 <sup>+</sup> CD21 <sup>+</sup> rHA <sup>+</sup> B cells/ml |
| 11. Ac IgM <sup>+</sup> rHA <sup>+</sup> B cells/ml | 23. F <sub>up</sub> CD27 <sup>+</sup> CD21 <sup>-</sup> rHA <sup>+</sup> B cells/ml |
| 12. Ac IgA <sup>+</sup> rHA <sup>+</sup> B cells/ml | 24. F <sub>up</sub> CD27 <sup>-</sup> CD21 <sup>-</sup> rHA <sup>+</sup> B cells/ml |

**Supplementary Figure 4. Correlation matrix of antibodies, ASCs, cTfhs and HA-specific B cells.** Spearman's correlation (two-sided) was calculated for each parameter and  $p$ -values ( $1 \times 10^{-14} > p < 0.1$ ) for each correlation are plotted on the right. Only patients with acute HA-probe data sets were included in the analysis ( $n=29$ ).

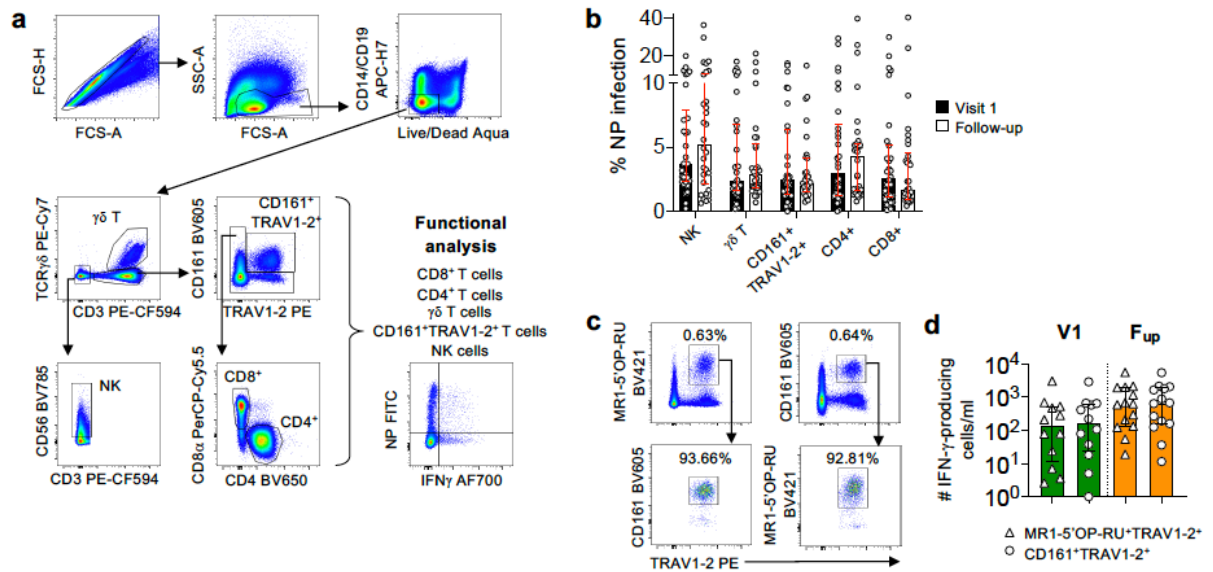

**Supplementary Figure 5. Functional assessment of innate and adaptive immune cells. a-d**, Data following influenza virus infection assay. **a**, FACS gating strategy measuring IFN- $\gamma$  production from all cell subsets related to Fig. 5a-d. **b**, Frequency of intracellular NP staining per cell subset ( $n=30$ ). **c**, Comparative FACS staining of MAIT cells, gated on live/CD19<sup>-</sup>/CD14<sup>-</sup>/CD3<sup>+</sup>/TCR $\gamma\delta$ <sup>-</sup> cells, using MR1-5'OP-RU-tetramer versus CD161 as surrogate markers for TRAV1-2<sup>+</sup> MAIT cells. **d**, Numbers of IFN- $\gamma$ -producing MAIT cells using both surrogate markers ( $n=17$ ). **b,d**, Median bars and IQR are shown.

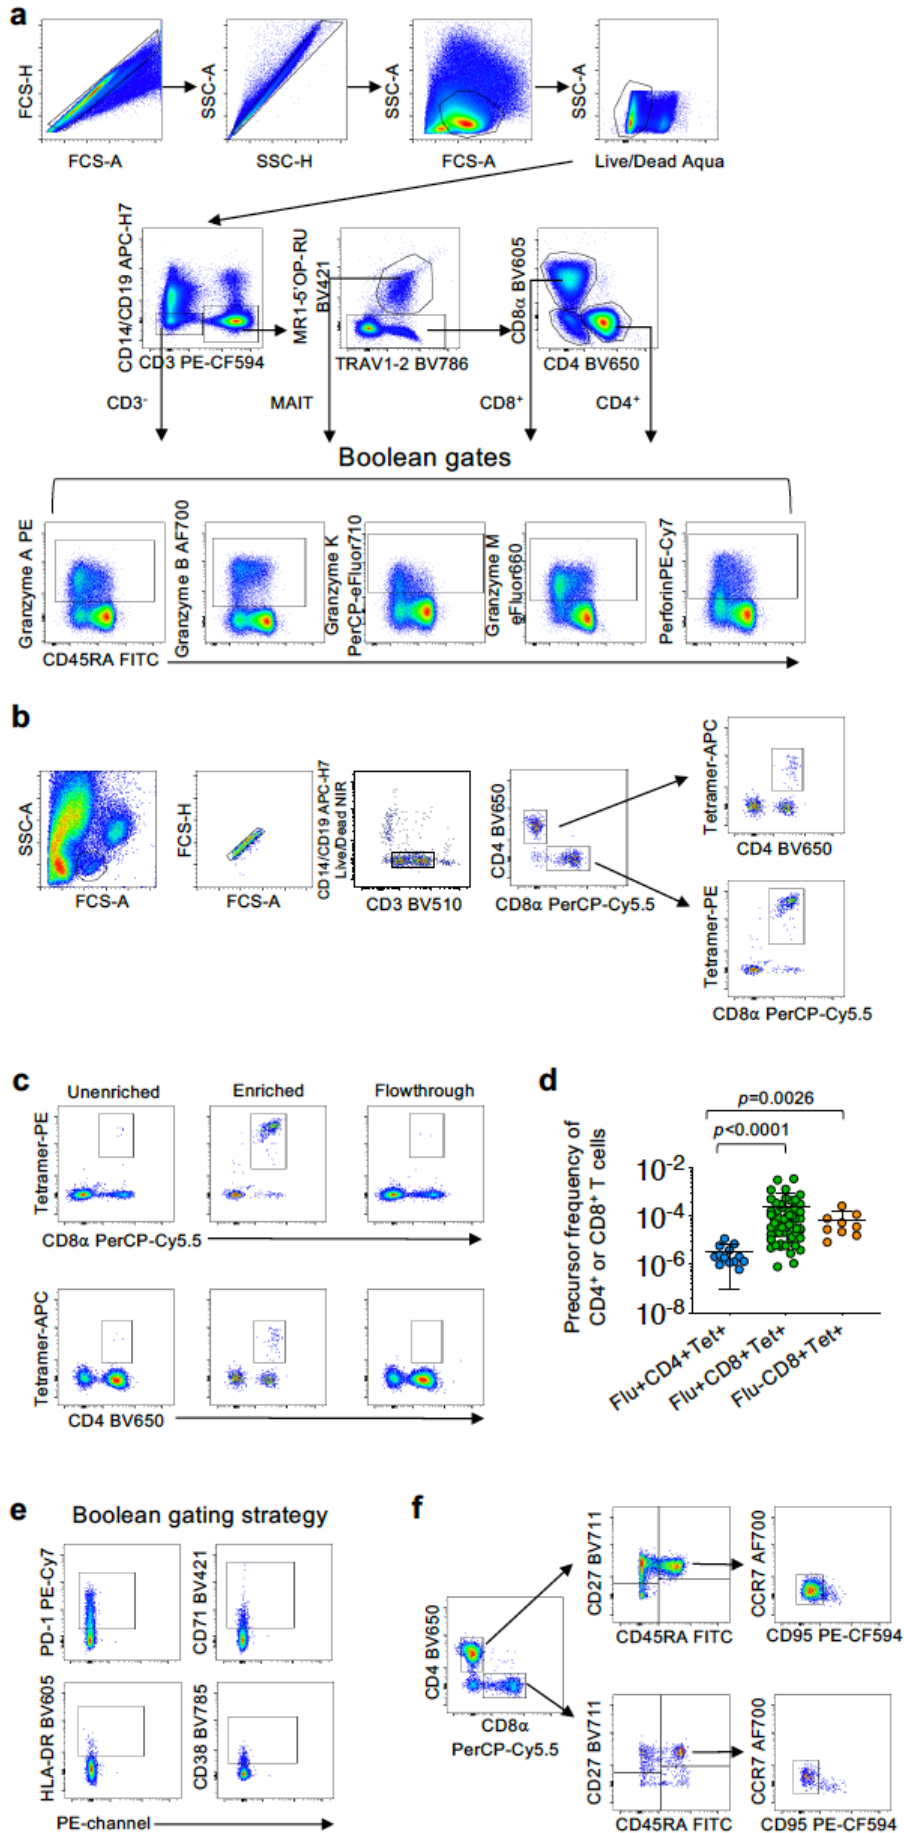

**Supplementary Figure 6. TAME and phenotypic analysis of influenza-specific T cells.** **a**, Boolean gating strategy for measuring each cell subset expressing a combination of granzymes A, B, K and M and perforin related to Fig. 5e-g. Data from PBMCs left over from flow through fraction following TAME. **b**, Representative FACS plots of enriched class I and class II tetramer populations following TAME related to Fig. 6a-f. **c**, Representative FACS plots showing the unenriched, enriched and flowthrough fractions of class I (top panels) and class II (bottom panels) tetramer<sup>+</sup> populations related to Fig. 6a-f. **d**, Pooled tetramer<sup>+</sup> precursor frequencies. Mean and SD are shown. Statistical significance ( $0.0001 > p < 0.05$ ) was determined using Kruskal-Wallis test (two-sided). **e**, Boolean gating strategy of activation markers PD-1, CD71, HLA-DR and CD38 for CD4<sup>+</sup>, CD8<sup>+</sup> and tetramer<sup>+</sup> T cell populations related to Fig. 6g-i. (F) Phenotypic gating strategy based on T cell differentiation markers related to Fig. 6j.



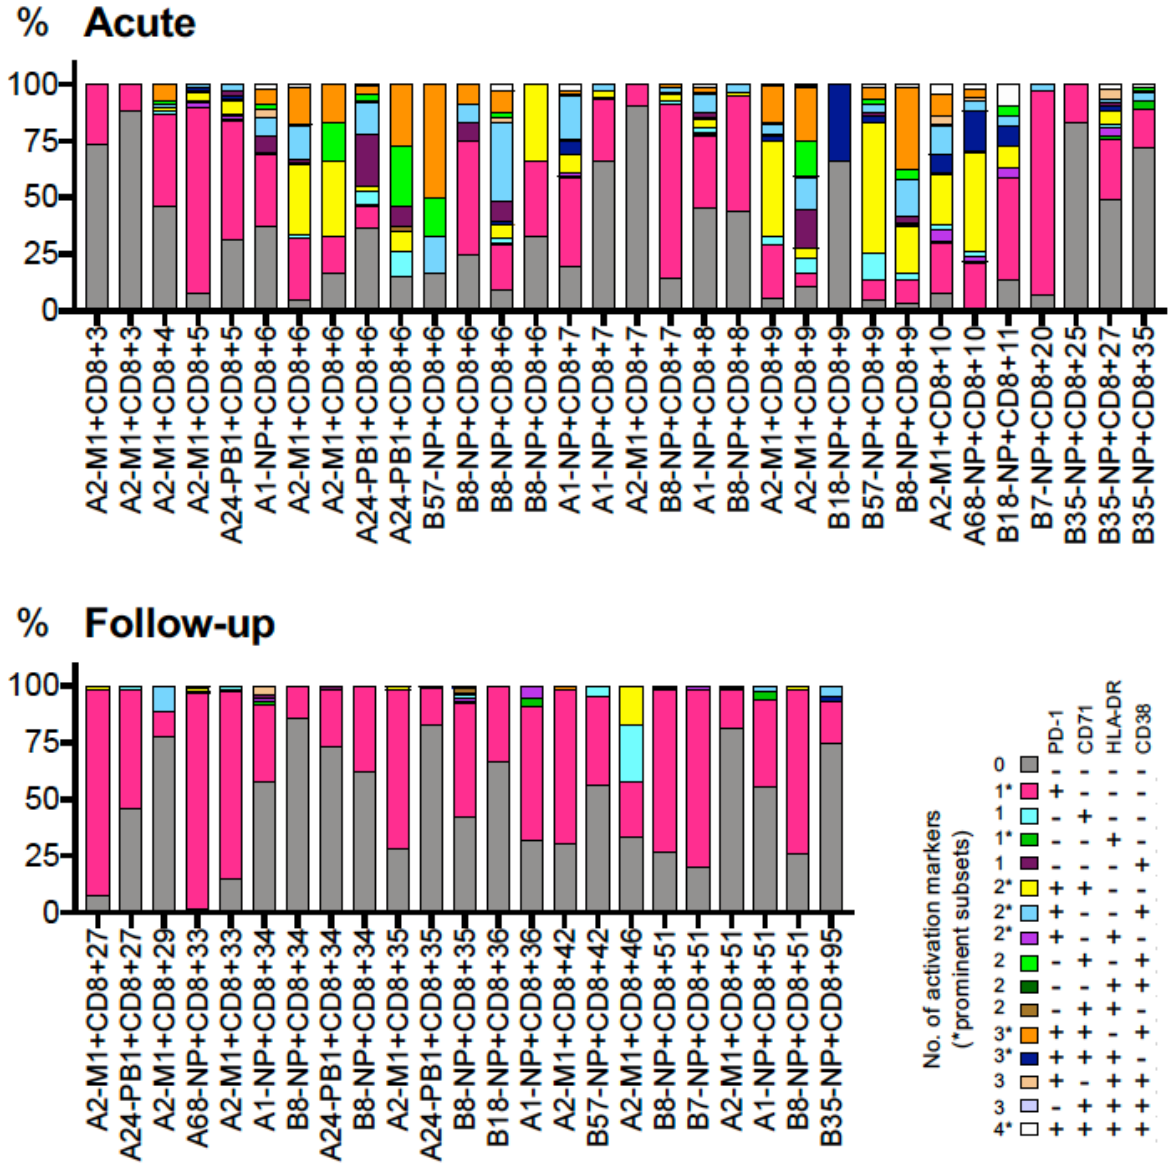

**Supplementary Figure 7. Activation phenotype of class I-tetramer<sup>+</sup> CD8<sup>+</sup> T cells.** Frequencies of activation markers on TAME-enriched tetramer<sup>+</sup> cells at acute and follow-up timepoints. Patients are plotted individually and ordered along the x-axis by epitope+days of disease onset.

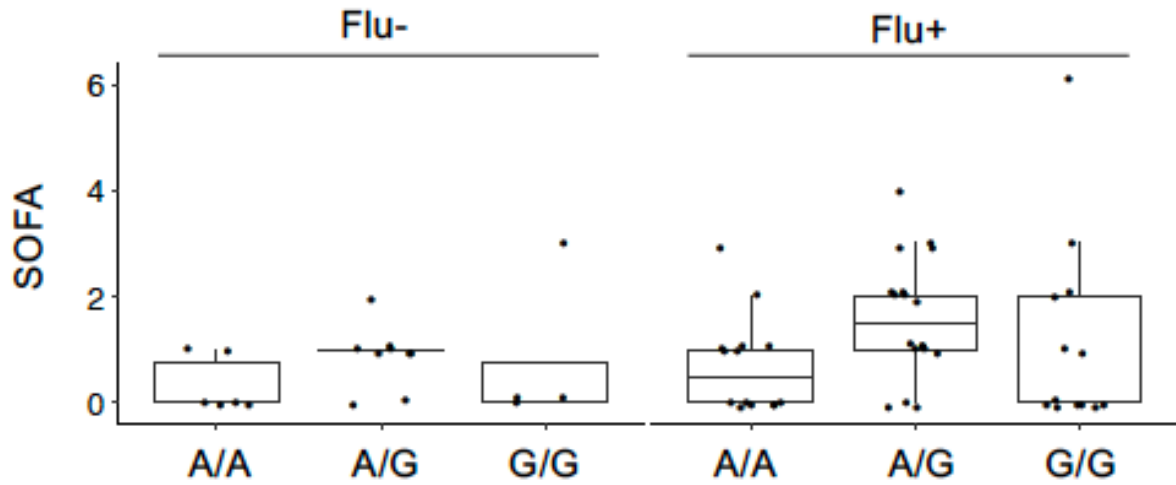

**Supplementary Figure 8. No differences in IFITM SNPs and SOFA scores.** Box plots of rs34481144 alleles against SOFA scores in influenza+ ( $n=44$ ) and influenza- ( $n=20$ ) patients showing median, IQR and whiskers extending to the largest or smallest values no further than 1.5 times the IQR.

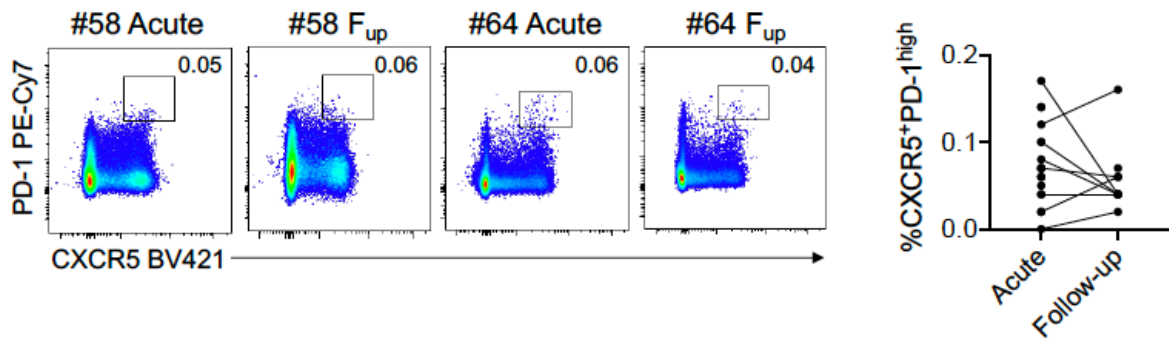

**Supplementary Figure 9. CXCR5<sup>+</sup>PD-1<sup>high</sup> cTfh cells in the blood.** Representative CXCR5 and PD-1<sup>high</sup> expression and frequencies of CXCR5<sup>+</sup>PD-1<sup>high</sup> cTfh cells of total CD4<sup>+</sup> T cells in influenza<sup>+</sup> patients ( $n=14$ ) at acute and follow-up (F<sub>up</sub>) where available. Cells were gated on live/CD3<sup>+</sup>/CD4<sup>+</sup> T cells.

Supplementary Table 1. Patient summary.

|                                                                        | Influenza-positive,<br>value | Influenza-negative,<br>value |
|------------------------------------------------------------------------|------------------------------|------------------------------|
| Sample size                                                            | 44                           | 20                           |
| Influenza A (%)                                                        | 34 (77%)                     |                              |
| pH1N1, H3N2, unsubtyped                                                | 7, 24, 3                     |                              |
| Influenza B (%)                                                        | 10 (23%)                     |                              |
| Phuket, Brisbane, unsubtyped                                           | 4, 3, 3                      |                              |
| RSV                                                                    |                              | 3                            |
| Parainfluenza 1                                                        |                              | 3                            |
| Picornavirus                                                           |                              | 3                            |
| Other                                                                  |                              | 11                           |
| Age, median (range)                                                    | 54 (21-90)                   | 47 (20-90)                   |
| Male (%)                                                               | 25 (57%)                     | 10 (50%)                     |
| Ethnicity                                                              |                              |                              |
| White Australian                                                       | 36 (82%)                     | 19 (95%)                     |
| White Australian/Non Aboriginal/Torres Strait Islander                 | 3 (7%)                       |                              |
| Non Aboriginal/Torres Strait Islander                                  | 3 (7%)                       | 1 (5%)                       |
| Asian                                                                  | 1 (2%)                       |                              |
| Other (Sri Lankan)                                                     | 1 (2%)                       |                              |
| Significant high-risk conditions*                                      | 38 (86%)                     | 14 (70%)                     |
| Type of high-risk condition <sup>^</sup>                               |                              |                              |
| Immunosuppressed                                                       | 20                           | 9                            |
| Chronic respiratory disease                                            | 27                           | 8                            |
| Cardiac disease                                                        | 6                            | 1                            |
| Chronic renal disease                                                  | 7                            | 5                            |
| Liver disease                                                          | 4                            | 1                            |
| Neurologic disorders                                                   | 6                            | 1                            |
| Haematologic/malignancy disorders                                      | 2                            | 1                            |
| Diabetes                                                               | 8                            | 5                            |
| Healthcare worker                                                      | 2                            | 1                            |
| Organ transplant recipient                                             | 2                            |                              |
| HIV-positive                                                           | 3                            | 2                            |
| Obesity                                                                | 6                            | 3                            |
| Vaccination status prior to infection                                  |                              |                              |
| Vaccinated in the year of infection                                    | 21 (48%)                     | 13 (65%)                     |
| Vaccinated 1-2 seasons prior to infection                              | 6 (14%)                      | 3 (15%)                      |
| Vaccinated at least twice (year of infection and previous 1-2 seasons) | 17 (39%)                     | 11 (55%)                     |
| Total days in hospital, median (range)                                 | 4 (1-38)                     | 4 (1-61)                     |
| Days from disease onset to admission, median (range)                   | 4 (-4-23)                    | 3 (1-14)                     |
| Days from disease onset to discharge/death, median (range)             | 8 (3-35)                     | 10 (3-68)                    |
| Days from disease onset to follow-up, median (range)                   | 41 (25-95)                   | 39 (27-84)                   |
| Complications during acute illness                                     |                              |                              |
| Intensive care required                                                | 1                            |                              |
| Non-invasive support required                                          | 3                            | 1                            |
| Pneumonia on clinical presentation                                     | 6                            | 1                            |
| Bronchitis                                                             |                              | 1                            |
| Bronchiectasis                                                         | 1                            | 1                            |
| Secondary bacterial infection                                          | 1                            |                              |
| Bacterial growth in sputum or faecal                                   | 6                            | 2                            |
| Exacerbation of COPD                                                   | 1                            | 1                            |
| Febrile neutropenia                                                    | 1                            | 1                            |
| Atrial fibrillation                                                    | 1                            |                              |
| Tachypnoea                                                             |                              | 1                            |
| Death                                                                  | 1                            | 1                            |
| Received antiviral therapy (%)                                         | 37 (84%)                     | 9 (45%)                      |
| Received oseltamivir                                                   | 36                           | 9                            |

\*Persons with high-risk conditions defined by the Communicable Diseases Network Australia (CDNA)

National Guidelines for Public Health Units: Seasonal Influenza Infection

<sup>^</sup>Any participant with one or more conditions

Supplementary Table 2. Panel of influenza viruses used in the antibody landscapes.

| Group                                | Virus strain                    | Abbreviation     | Vaccine component year (Australia) |
|--------------------------------------|---------------------------------|------------------|------------------------------------|
| H1N1                                 | A/H1N1/Puerto Rico/8/34         | PR/8/34          |                                    |
|                                      | A/H1N1/Brazil/11/78             | BRAZIL/11/78     |                                    |
|                                      | A/H1N1/Fukushima/141/06         | FUK/141/06       |                                    |
|                                      | A/H1N1/Brisbane/59/07           | BRIS/59/07       |                                    |
|                                      | A/H1N1/California/07/2009       | CAL/07/09        | 2014-16 vaccine                    |
|                                      | A/H1N1/Michigan/45/2015         | MICH/45/15       | 2017-18 vaccine                    |
| H3N2                                 | A/H3N2/Port Chalmers/1/1973     | PC/1/73          |                                    |
|                                      | A/H3N2/Texas/1/1977             | TEXAS/1/77       |                                    |
|                                      | A/H3N2/Panama/2007/1999         | PANAMA/2007/99   |                                    |
|                                      | A/H3N2/Brisbane/10/2007         | BRIS/10/07       |                                    |
|                                      | A/H3N2/Perth/16/2009            | PERTH/16/09      |                                    |
|                                      | A/H3N2/Victoria/361/2011        | VICTORIA/361/11  |                                    |
|                                      | A/H3N2/Texas/50/2012            | TEXAS/50/12      | 2014 vaccine                       |
|                                      | A/H3N2/Victoria/2078/2014       | VICTORIA/2078/14 |                                    |
|                                      | A/H3N2/South Australia/91/2014  | SOUTH AUS/91/14  |                                    |
|                                      | A/H3N2/Victoria/3044/2014       | VICTORIA/3044/14 |                                    |
|                                      | A/H3N2/Newcastle/22/2014        | NEWCASTLE/22/14  |                                    |
|                                      | A/H3N2/Switzerland/9715293/2013 | SWI/9715293/13   | 2015 vaccine                       |
|                                      | A/H3N2/New Caledonia/71/2014    | NEWCALED/71/14   |                                    |
|                                      | A/H3N2/Brisbane/47/2015         | BRISB/47/15      |                                    |
| A/H3N2/Hong Kong/4801/2014           | HONGKONG/4801/14                | 2016-17 vaccine  |                                    |
| A/H3N2/Singapore/INFIMH-16-0019/2016 | SING/INFIMH-16-0019/16          | 2018 vaccine     |                                    |
| B*                                   | B/YAM/Brisbane/1/2007           | BRIS/1/07        |                                    |
|                                      | B/YAM/Massachusetts/02/2012     | MASS/02/12       | 2014 TIV vaccine                   |
|                                      | B/YAM/Phuket/3073/2013          | PHUKET/3073/13   | 2015 TIV, 2016-2018 QIV vaccine    |
|                                      | B/YAM/Sydney/7/2014             | SYDNEY/7/14      |                                    |
|                                      | B/YAM/Brisbane/9/2014           | BRIS/9/14        |                                    |
|                                      | B/VIC/Brisbane/60/2008          | BRIS/60/08       | 2016-2018 vaccine                  |
| B/VIC/Brisbane/46/2015               | BRIS/46/15                      |                  |                                    |

\*TIV was substituted with the QIV in 2016 to incorporate both influenza B Yamagata and Victoria strains.

Supplementary Table 3. Healthy donors used in this study (Fig. 4, G to I).

| Donor code | Age | Sex | Blood product     | Source                         | MAIT cells measured |
|------------|-----|-----|-------------------|--------------------------------|---------------------|
| B124       | 49  | M   | Buffy pack        | Australian Red Cross Lifeblood | Yes                 |
| B125       | 75  | F   | Buffy pack        | Australian Red Cross Lifeblood | Yes                 |
| B126       | 27  | M   | Buffy pack        | Australian Red Cross Lifeblood | Yes                 |
| B127       | 68  | F   | Buffy pack        | Australian Red Cross Lifeblood | Yes                 |
| B142       | 20  | F   | Buffy pack        | Australian Red Cross Lifeblood | N/A                 |
| B143       | 70  | F   | Buffy pack        | Australian Red Cross Lifeblood | N/A                 |
| B144       | 36  | M   | Buffy pack        | Australian Red Cross Lifeblood | N/A                 |
| B150       | 34  | M   | Buffy pack        | Australian Red Cross Lifeblood | N/A                 |
| B153       | 29  | M   | Buffy pack        | Australian Red Cross Lifeblood | N/A                 |
| B154       | 36  | M   | Buffy pack        | Australian Red Cross Lifeblood | N/A                 |
| B155       | 35  | F   | Buffy pack        | Australian Red Cross Lifeblood | N/A                 |
| B156       | 39  | M   | Buffy pack        | Australian Red Cross Lifeblood | N/A                 |
| K26        | 29  | M   | Heparinized blood | Healthy volunteers             | Yes                 |
| K28        | 35  | F   | Heparinized blood | Healthy volunteers             | Yes                 |
| K99        | 21  | F   | Heparinized blood | Healthy volunteers             | Yes                 |
| K100       | 22  | F   | Heparinized blood | Healthy volunteers             | Yes                 |
| D8         | 78  | M   | Heparinized blood | Deepdene Surgery               | Yes                 |
| D11        | 79  | F   | Heparinized blood | Deepdene Surgery               | Yes                 |
| D13        | 87  | F   | Heparinized blood | Deepdene Surgery               | Yes                 |
| D16        | 72  | M   | Heparinized blood | Deepdene Surgery               | Yes                 |

Abbreviations: F, female; M, male; N/A, not available.

Supplementary Table 4. HLA population coverage across ethnicities.

| Average frequency (%) | Caucasoid* | Oriental* | African* | Amerindian* | Alaskan Yupik <sup>#</sup> | Australian Aboriginals* |
|-----------------------|------------|-----------|----------|-------------|----------------------------|-------------------------|
| HLA-A1                | 14.07      | 3.66      | 4.85     | 5.50        | 0.40                       | 1.00                    |
| HLA-A2                | 25.01      | 27.17     | 15.76    | 24.78       | 2.40                       | 7.85                    |
| HLA-A24               | 10.36      | 23.97     | 3.14     | 30.90       | 58.10                      | 48.75                   |
| HLA-A68               | 3.99       | 1.29      | 9.68     | 5.95        | 10.10                      | 1.50                    |
| HLA-B7                | 8.67       | 3.37      | 7.71     | 2.38        | 1.60                       | 0.75                    |
| HLA-B8                | 7.41       | 1.40      | 4.83     | 1.10        | 0.40                       | 0.50                    |
| HLA-B18               | 6.31       | 0.92      | 4.62     | 0.50        | 0.60                       | 0.00                    |
| HLA-B35               | 10.33      | 5.03      | 5.53     | 17.53       | 10.70                      | 1.75                    |
| HLA-B57               | 2.91       | 1.33      | 3.96     | 0.68        | 0.00                       | 1.75                    |
| HLA-DR1               | 9.42       | 2.98      | 5.46     | 1.5         | 0.40                       | 1.00 <sup>^</sup>       |
| HLA-DR4               | 12.82      | 12.99     | 10.51    | 40.00       | 23.20                      | 0.50 <sup>^</sup>       |
| HLA-DR11              | 13.36      | 7.74      | 15.74    | 11.65       | 10.70                      | N/A                     |
| Total                 | >100       | 91.85     | 91.79    | >100        | >100                       | 63.85                   |

Percentages based on HLA coverage for the relevant HLA supertype. N/A, not available.

\*Marsh SGE, et al. (2000) The HLA Factsbook (Academic Press, San Diego).

<sup>#</sup>www.allelefreqencies.net.

<sup>^</sup>Australia Cape York Peninsula Aborigine (www.allelefreqencies.net).

Supplementary Table 5. List of primers.

| Primer                | Forward (F) 5'-3'     | Reverse (R) 5'-3'             |
|-----------------------|-----------------------|-------------------------------|
| IFITM3 amplification* | GGAAACTGTTGAGAAACCGAA | CATACGCACCTTCACGGAGT          |
| rs34481144 sequencing | ACAGCCACCTCGTGCTCCTC  | GTTGAGAAACCGAAACTACTGGG       |
| A-HA-Uni              | GGGGGAGCAAAAGCAGGGGA  | CCGGGTATTAGTAGAAACAAGGG<br>TG |
| B-HANA-Uni3           | GGGGGAGCAGAAGCAGAGC   | CCGGGATATTAGTAGTAACAAGAG<br>C |

\*Primers were used to amplify both *exon 1* rs12552 and rs34481144 promoter regions. The same primers were used to sequence rs12252.
