# Supplementary material for: Immune cellular networks underlying recovery from influenza virus infection in acute hospitalized patients
Source: PubMed Central journal article supplement (PMC8113517; doi:10.1038/s41467-021-23018-x), 2021-05-11
Supplement: 41467_2021_23018_MOESM3_ESM.pdf [file 41467_2021_23018_MOESM3_ESM.pdf]

## **Description of Additional Supplementary Files**

File Name: Supplementary Data 1

Description: Individual patient demographics and HLA typing.xls

File Name: Supplementary Data 2

Description: Interactive unsupervised heatmaps of acute influenza+.html

File Name: Supplementary Data 3

Description: Interactive unsupervised heatmaps of convalescent influenza+.html

File Name: Supplementary Data 4

Description: Interactive unsupervised heatmaps of acute influenza-.html

File Name: Supplementary Data 5

Description: Interactive unsupervised heatmaps of convalescent influenza-.html

File Name: Supplementary Data 6

Description: Interactive unsupervised heatmaps of full influenza+ and influenza- cohort.html

File Name: Supplementary Data 7

Description: Patient sample used for each assay.xls

File Name: Supplementary Data 8

Description: Antibody panels used for flow cytometry.xls
